# Supplementary material for: Behavioral observations, heart rate and heart rate variability in horses following oral administration of a cannabidiol containing paste in three escalating doses (part 1/2)
Source: PubMed Central journal article supplement (PMC10750369; doi:10.3389/fvets.2023.1305868), 2023-12-11
Supplement: Data_Sheet_1.pdf [file Data_Sheet_1.pdf]

# SUPPLEMENTARY MATERIAL

## 1 Figures

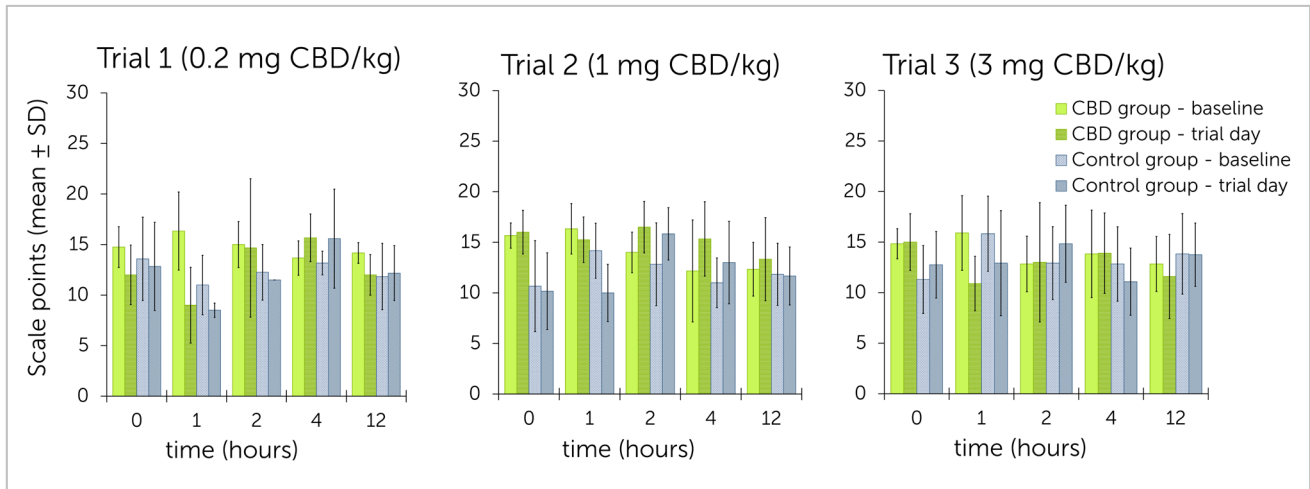

Supplementary Figure 1S: Sedation scores after acoustic stimulation with a clicker following single oral administration of cannabidiol (CBD) paste in escalating doses (0.2 mg CBD/kg; 1 mg CBD/kg; 3 mg CBD/kg) - comparison between values obtained on baseline and trial day for the treatment and control group. Higher scale points relate to a higher level of sedation (Table 1).

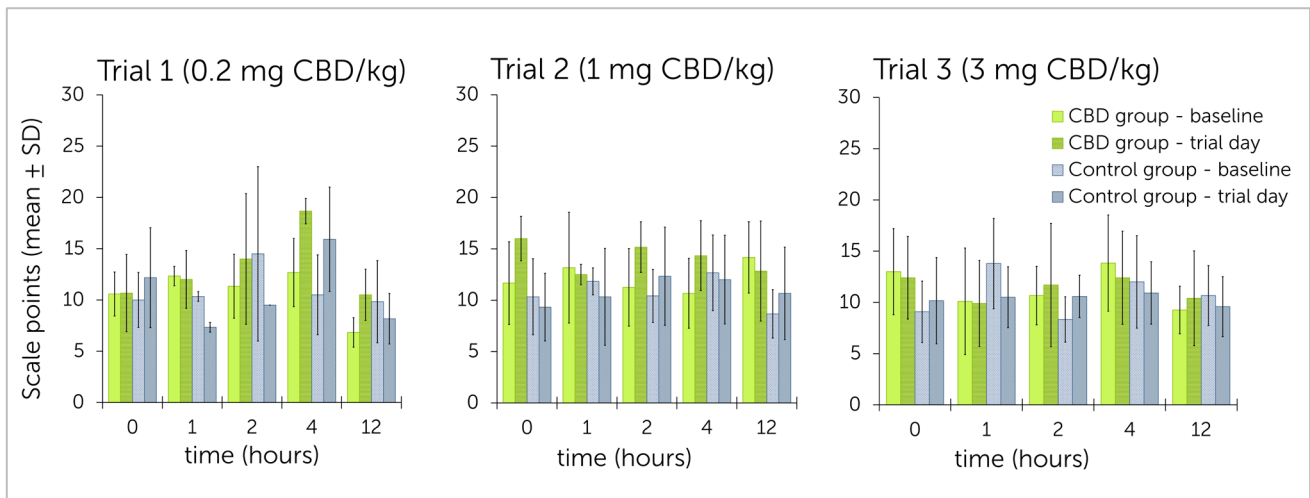

Supplementary Figure 2S: Sedation scores after acoustic stimulation with a plastic bag following single oral administration of cannabidiol (CBD) paste in escalating doses (0.2 mg CBD/kg; 1 mg CBD/kg; 3 mg CBD/kg) - comparison between values obtained on baseline and trial day for the treatment and control group. Higher scale points relate to a higher level of sedation (Table 1).

## SUPPLEMENTARY MATERIAL

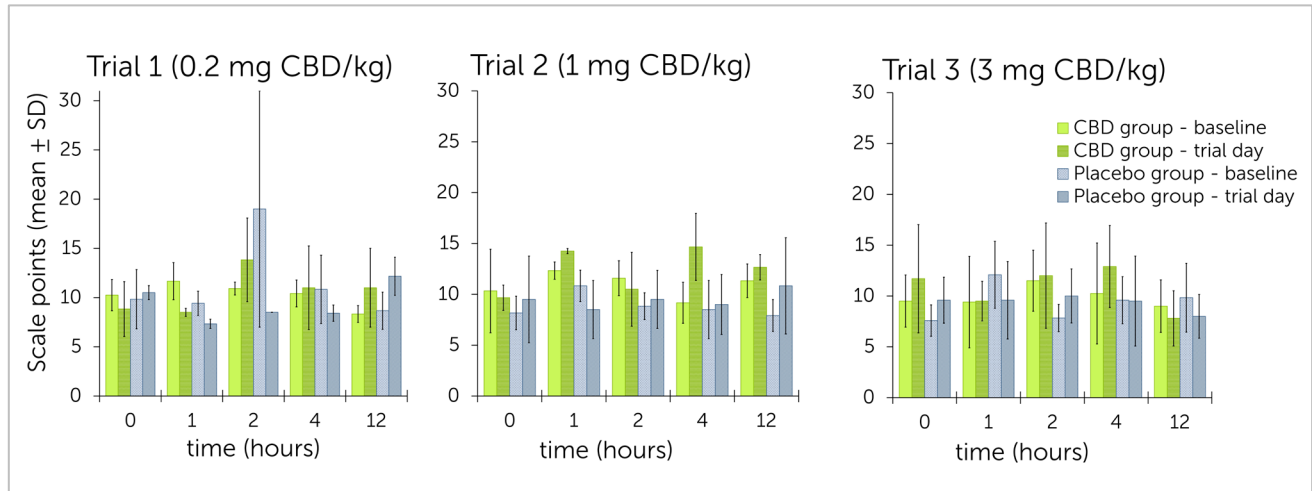

Supplementary Figure 3S: Sedation scores after visual stimulation with a pink cloth following single oral administration of cannabidiol (CBD) paste in escalating doses (0.2 mg CBD/kg; 1 mg CBD/kg; 3 mg CBD/kg) - comparison between values obtained on baseline and trial day for the treatment and control group. Higher scale points relate to a higher level of sedation (Table 1).

## SUPPLEMENTARY MATERIAL

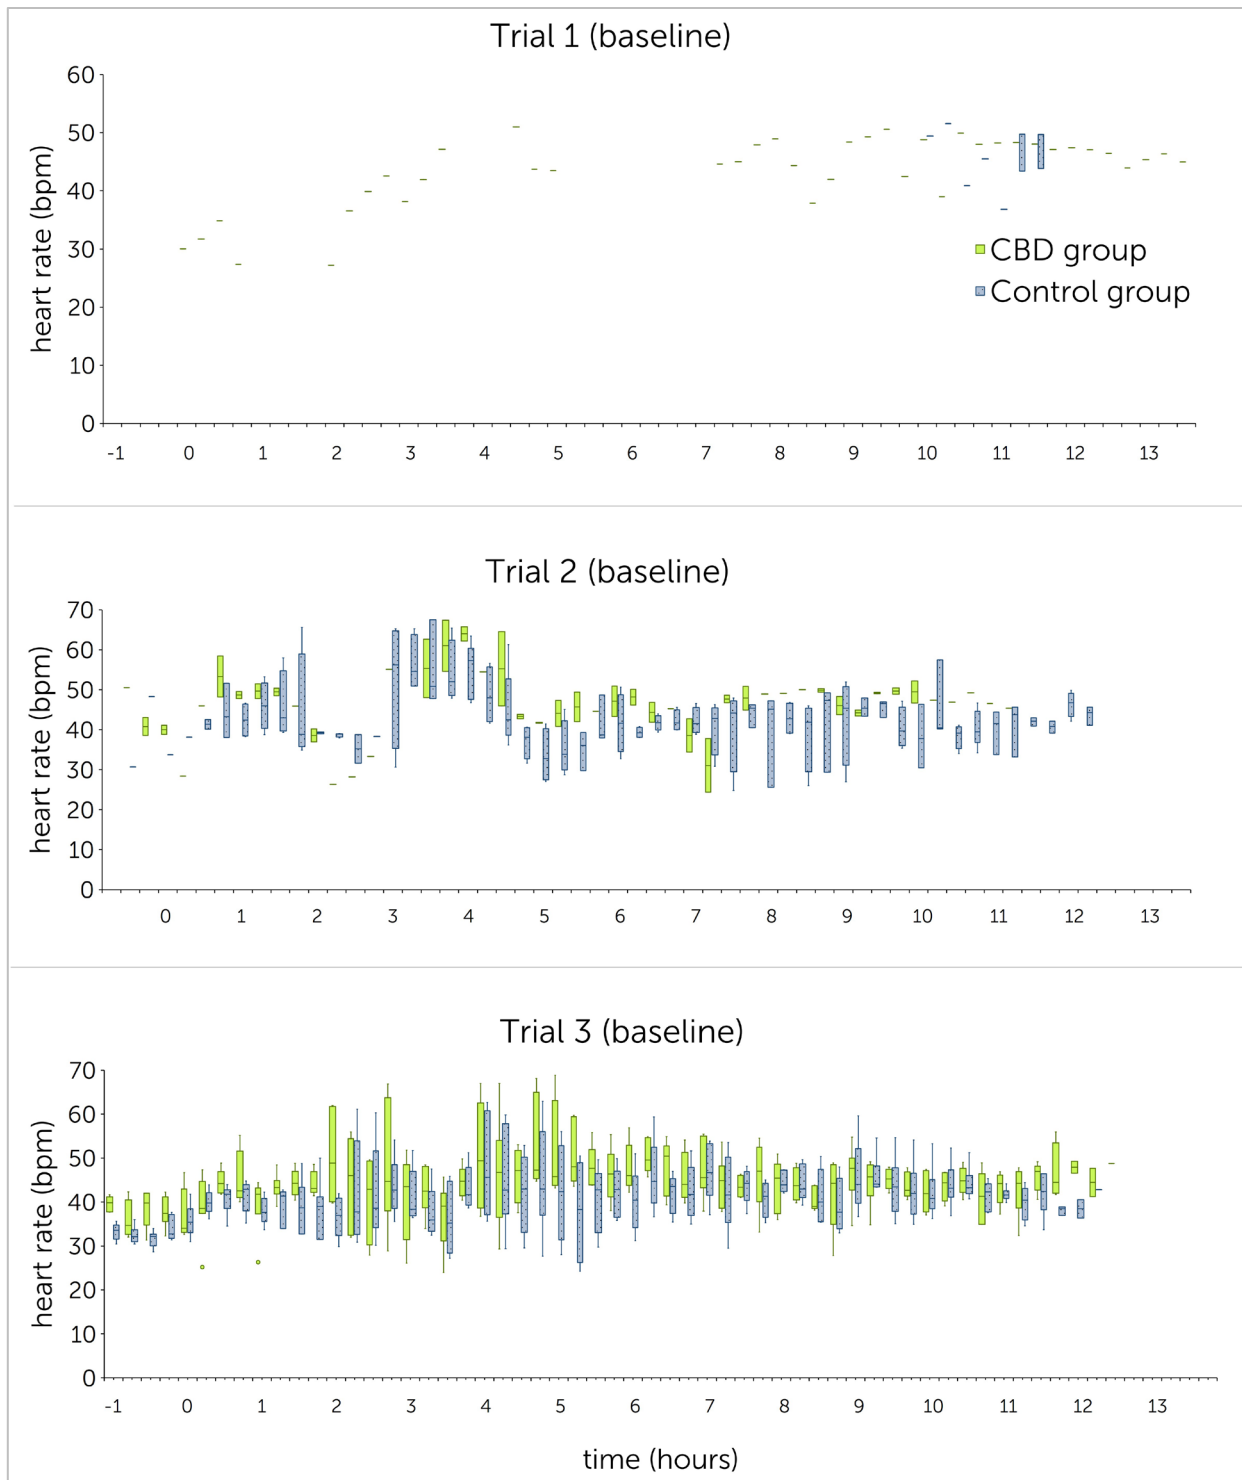

Supplementary Figure 4S: Heart rates (beats per minute (bpm)) prior to single oral administration of cannabidiol (CBD) in three escalating doses (0.2 mg CBD/kg BW; 1 mg CBD/kg BW; 3 mg CBD/kg BW), displayed in 15-minute sections over 12 hours. Due to technical issues, the trial 1 R-R-interval data are partly incomplete.

## SUPPLEMENTARY MATERIAL

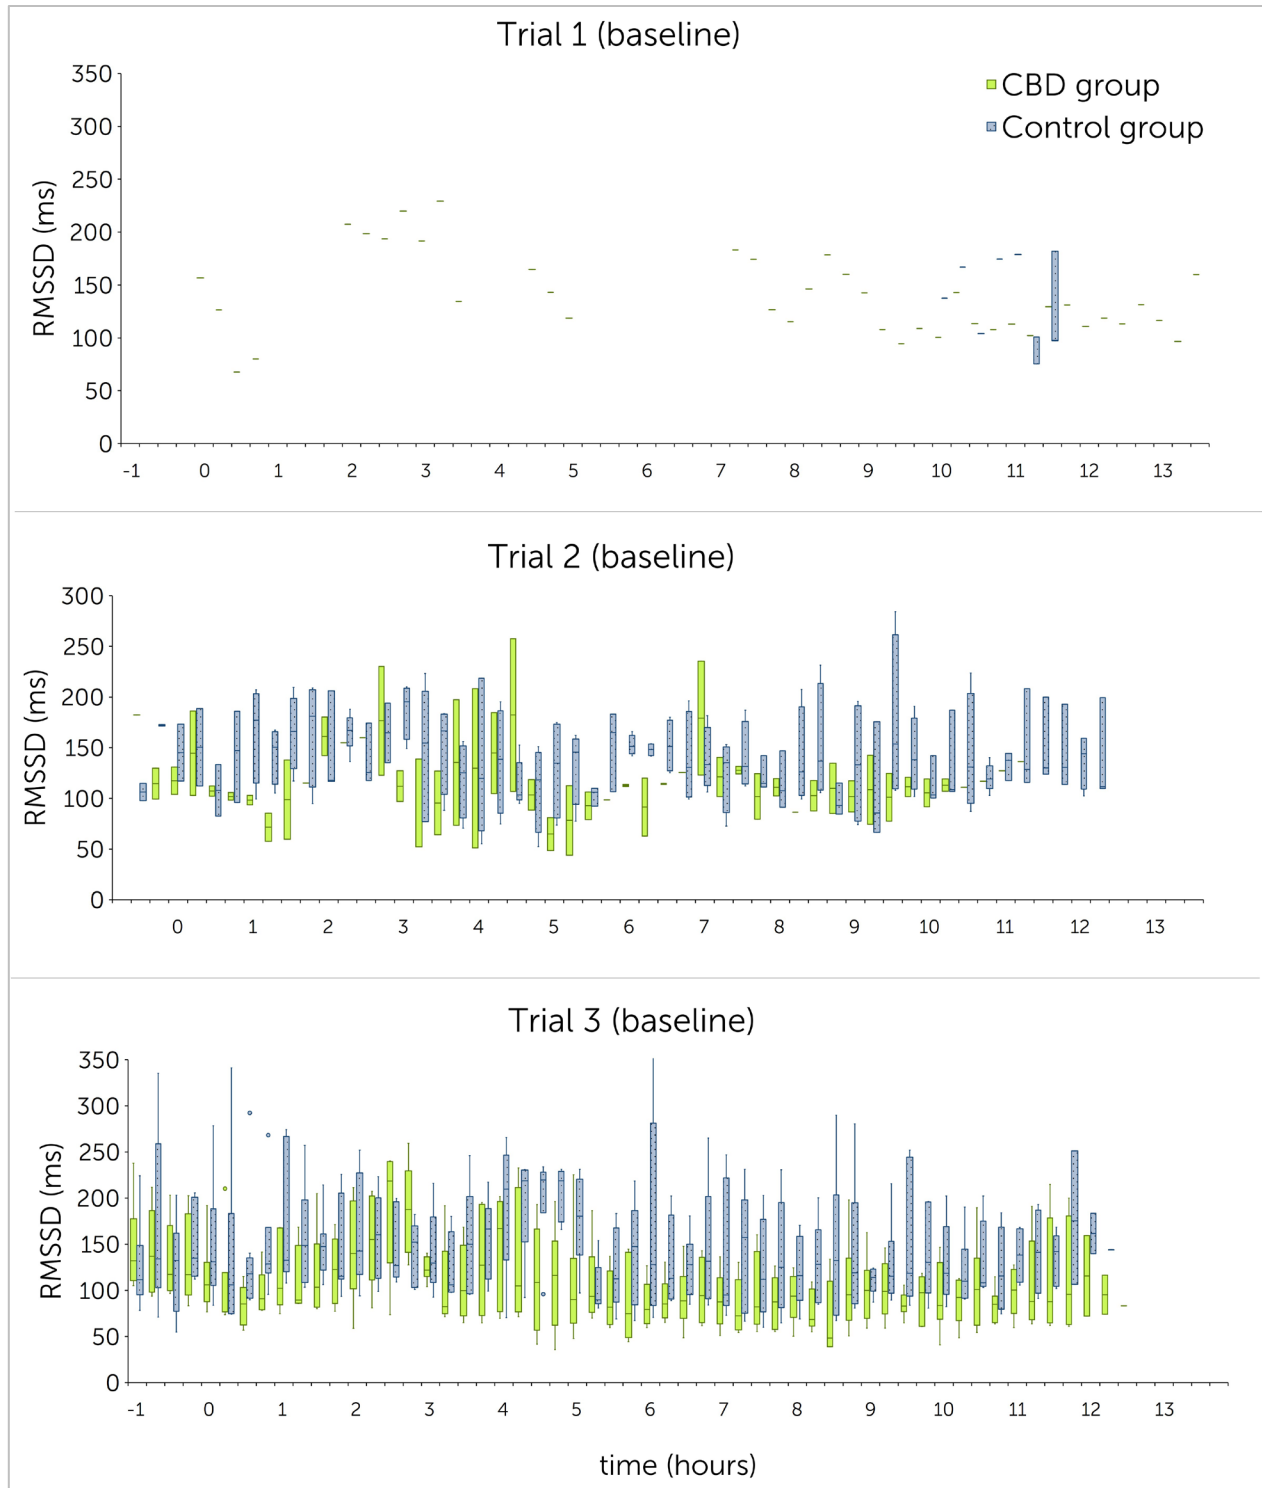

Supplementary Figure 5S: Root mean square of successive R-R interval differences (RMSSD) in milliseconds (ms) prior to single oral administration of cannabidiol (CBD) in three escalating doses (0.2 mg CBD/kg BW; 1 mg CBD/kg BW; 3 mg CBD/kg BW), displayed in 15-minute sections over 12 hours. Due to technical issues, the trial 1 R-R-interval data are partly incomplete.

## SUPPLEMENTARY MATERIAL

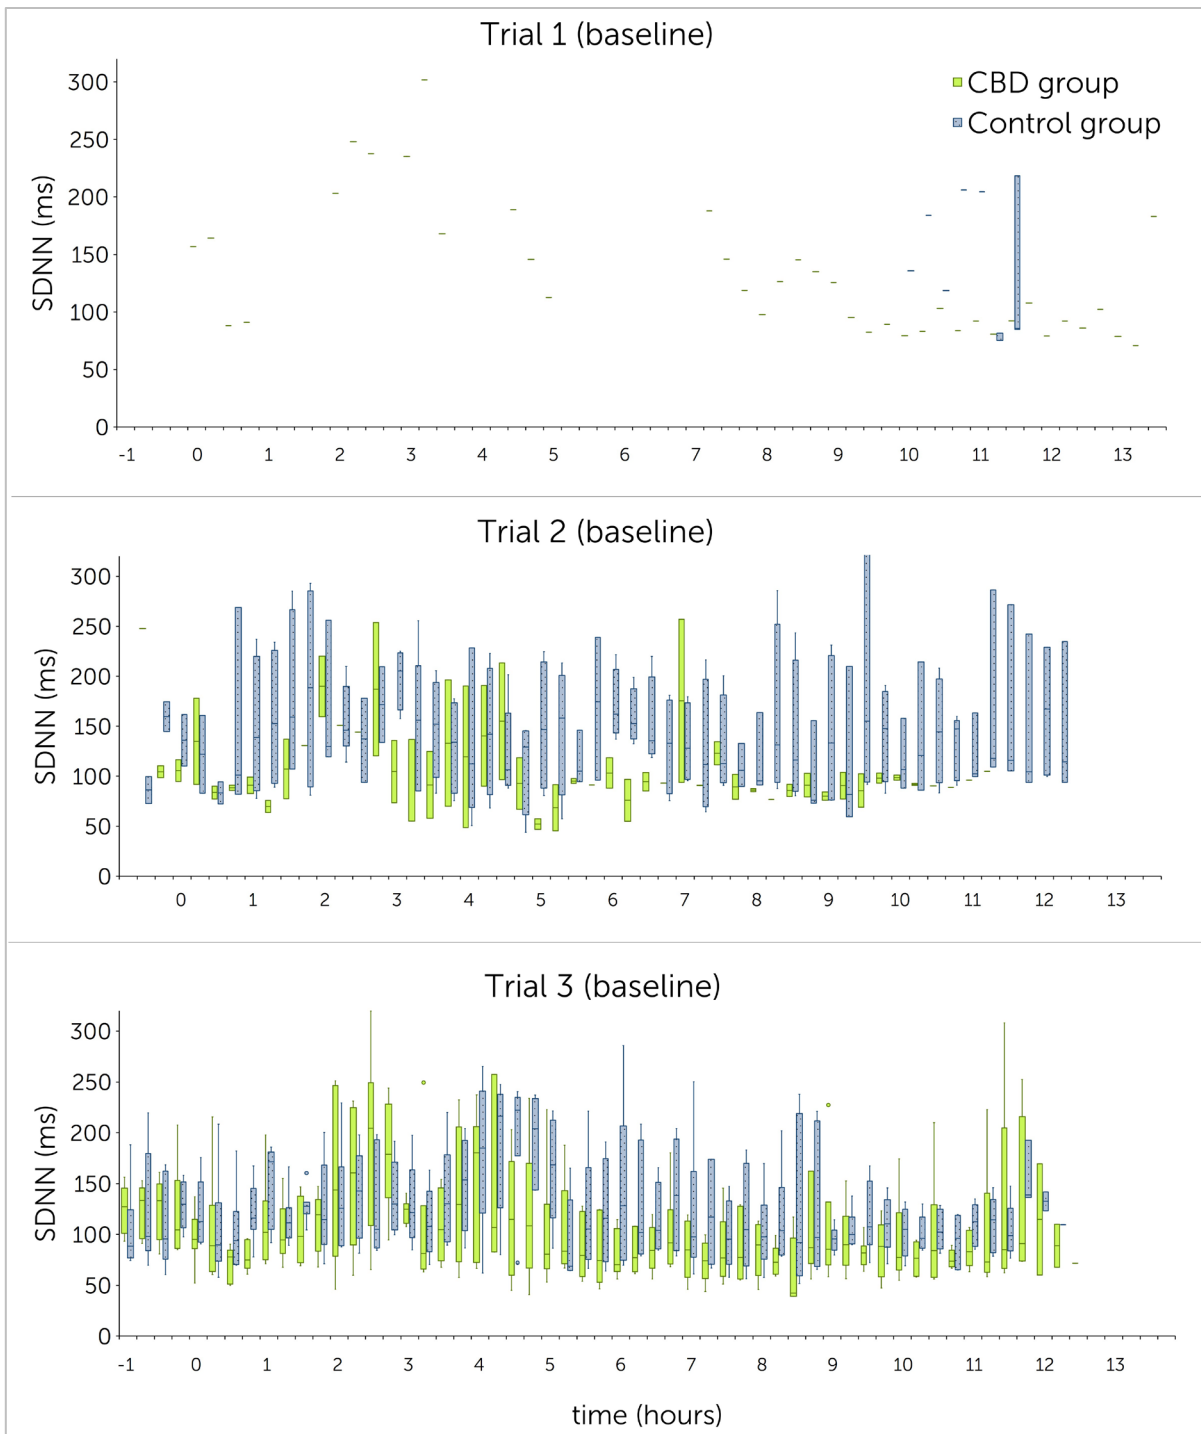

Supplementary Figure 6S: Standard deviations of R-R intervals (SDNN) in milliseconds (ms) prior to single oral administration of cannabidiol (CBD) in three escalating doses (0.2 mg CBD/kg BW; 1 mg CBD/kg BW; 3 mg CBD/kg BW), displayed in 15-minute sections over 12 hours. Due to technical issues, the trial 1 R-R-interval data are partly incomplete.

**SUPPLEMENTARY MATERIAL**

**2 Tables**

Supplementary Table 1S: Examples of the facial expression scale (Table 2).

|                                                                                     |                                                                                                                                                                                                                                                                                                                                                               |
|-------------------------------------------------------------------------------------|---------------------------------------------------------------------------------------------------------------------------------------------------------------------------------------------------------------------------------------------------------------------------------------------------------------------------------------------------------------|
|   | <p><b>Orbital opening</b><br/>2 Eyes completely open</p> <hr/> <p><b>Position of ears</b><br/>2 Pointed, position of attention</p> <hr/> <p><b>Chewing muscles</b><br/>2 Moderately present</p> <hr/> <p><b>Lips</b><br/>2 Loose touching of lips</p> <hr/> <p><b>Nostrils</b><br/>1 Dilated, outer ring clearly visible</p> <hr/> <p><b>Total sum: 9</b></p> |
|  | <p><b>Orbital opening</b><br/>2 Eyes completely open</p> <hr/> <p><b>Position of ears</b><br/>2 Pointed, position of attention</p> <hr/> <p><b>Chewing muscles</b><br/>2 Moderately present</p> <hr/> <p><b>Lips</b><br/>2 Loose touching of lips</p> <hr/> <p><b>Nostrils</b><br/>2 Non-dilated nostrils</p> <hr/> <p><b>Total sum: 10</b></p>               |

SUPPLEMENTARY MATERIAL

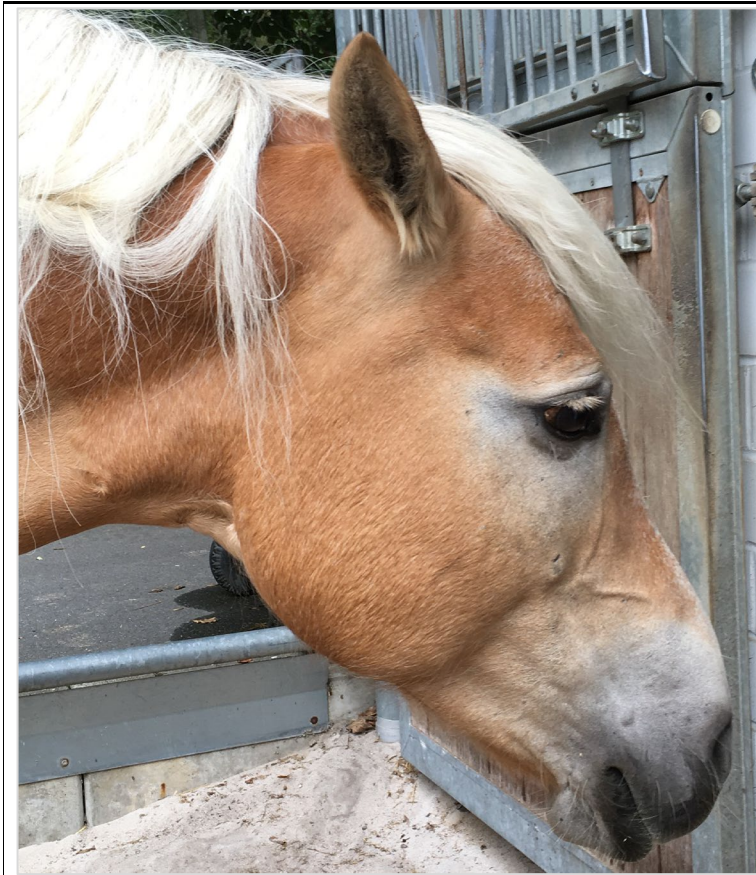

**Orbital opening**

3 Eyes partially open (> 50%)

**Position of ears**

3 Asymmetrical; one ear hanging

**Chewing muscles**

2 Moderately present

**Lips**

2 Loose touching of lips

**Nostrils**

3 Small nostrils, relaxed outer ring

**Total sum: 13**

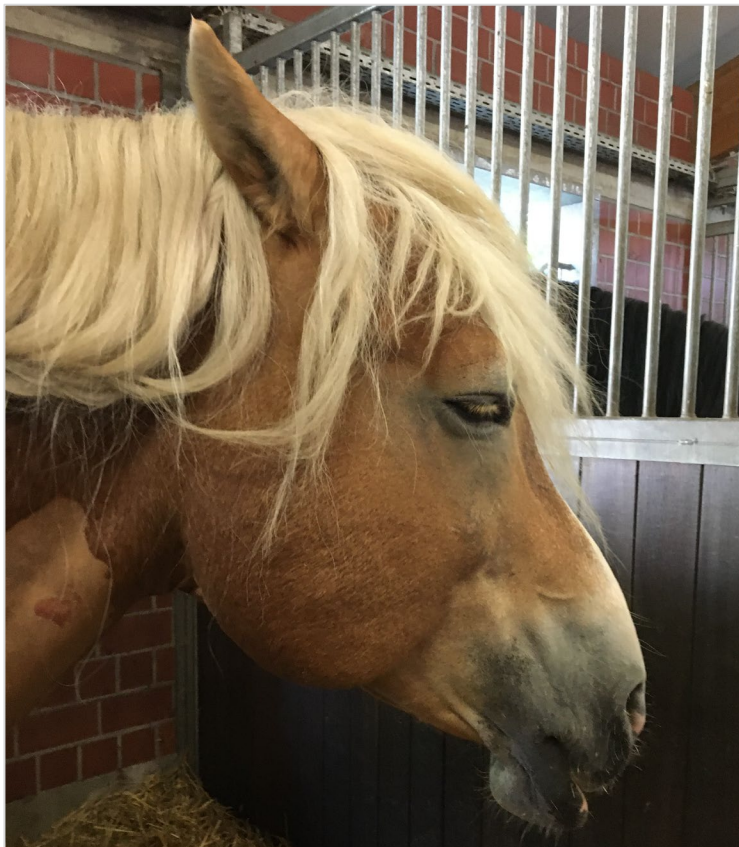

**Orbital opening**

4 Eyes almost/completely closed (< 50%)

**Position of ears**

4 Wide opening between ear tips

**Chewing muscles**

2 Moderately present

**Lips**

4 Pronounced relaxation/hanging of one lip

**Nostrils**

2 Non-dilated nostrils

**Total sum: 16**

## SUPPLEMENTARY MATERIAL

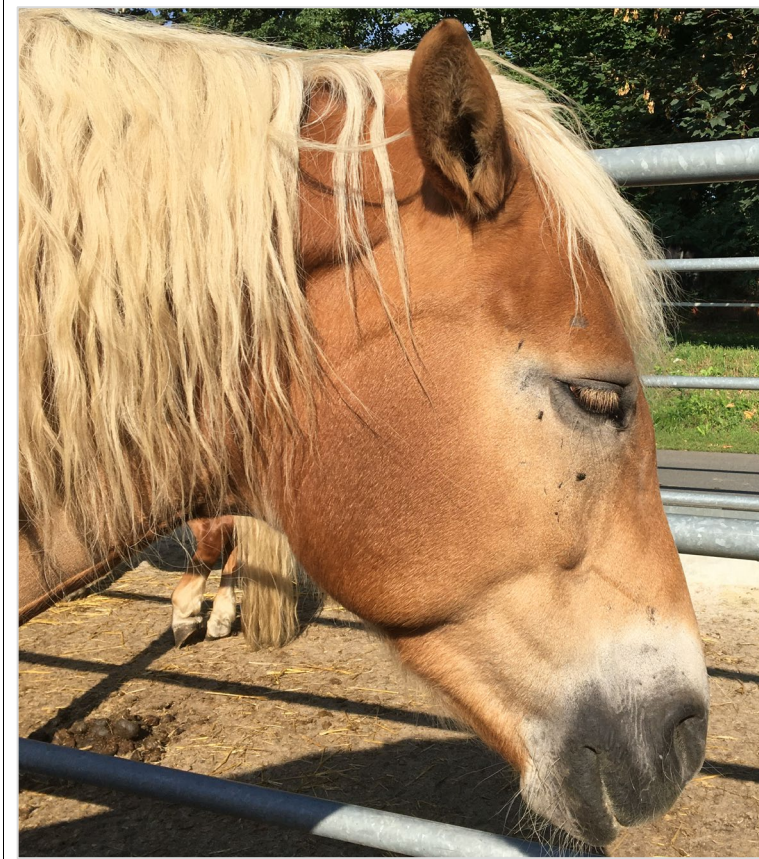

### **Orbital opening**

4 Eyes almost/completely closed (< 50%)

### **Position of ears**

4 Wide opening between ear tips

### **Chewing muscles**

3 Not present

### **Lips**

3 Slight relaxation of one lip

### **Nostrils**

3 Small nostrils, relaxed outer ring

**Total sum: 17**
